# Supplementary material
Source: PubMed Central journal article supplement (PMC4761481)
Supplement: NIHMS748705-supplement-1.pdf [file NIHMS748705-supplement-1.pdf]

Supplemental Table I. Primers used for qPCR

| <b>Gene</b> | <b>Sequences</b>                |
|-------------|---------------------------------|
| Oasl2-F     | TTGTGCGGAGGATCAGGTA             |
| Oasl2-R     | TGATGGTGTTCGAGTCTTTGA           |
| Trim21-F    | GGGAGGAGGTCACCTGTTCTA           |
| Trim21-R    | GGCACTCGGGACATGAACTG            |
| Rsad2-F     | TGCTGGCTGAGAATAGCATTAGG         |
| Rsad2-R     | GCTGAGTGTGTTCCCATCT             |
| Cd274-F     | GCTCCAAAGGACTTGTACGTG           |
| Cd274-R     | TGATCTGAAGGGCAGCATTTC           |
| H2-T22-F    | GCCTTGGATTTGGATTGTTGC           |
| H2-T22-R    | AAGACTCGCCAACTGAAGTTC           |
| Psmb8-F     | ATGGCGTTACTGGATCTGTGC           |
| psmb8-R     | CGCGGAGAACTGTAGTGTCC            |
| Upp1-F      | ACAGGAACTGAAGCAAAGGAC           |
| Upp1-R      | GTTGAAATGGTAGAGCACGTCTT         |
| Tap2-F      | CTGGCGGACATGGCTTTACTT           |
| Tap2-R      | CTCCCACTTTTAGCAGTCCCC           |
| Gbp2-F      | CTGCACTATGTGACGGAGCTA           |
| Gbp2-R      | GAGTCCACACAAAGGTTGGAAA          |
| Gbp3-F      | GAGGCACCCATTTGTCTGGT            |
| Gbp3-R      | CCGTCTGCAAGACGATTCA             |
| Igtp-F      | CTCATCAGCCCGTGGTCTAAA           |
| Igtp-R      | CACCGCCTTACCAATATCTTCAA         |
| Irgm1-F     | TGCTCCACTACTCCCCAACAT           |
| Irgm1-R     | GCTCCTACTGACCTCAGGTAAC          |
| Irgm2-F     | GGCAGTTGAGTCACCTGAGG            |
| Irgm2-R     | CCCCTTCTTTCACGGCAGT             |
| Usp18-F     | TTGGGCTCCTGAGGAAACC             |
| Usp18-R     | CGATGTTGTGTAAACCAACCAGA         |
| Rnf19b-F    | AGAAGAGGGTAATGGTGCTGG           |
| Rnf19b-R    | GTGATGTCTGGCACGTCATCT           |
| Ifit3-F     | AAATTCCAGGTGAAATGGCA            |
| Ifit3-R     | TTCCCAGCAGCACAGAAAC             |
| Nlrc5-F     | GTGCCAAACGTCCTTTTCAGA           |
| Nlrc5-R     | AGTGAGGAGTAAGCCATGCTC           |
| Irf8-F      | AGG CTG CAT GAG CGA AGT TC      |
| Irf8-R      | CCA TGT ACT CAT CCA CAG AAG GTT |
| Ifit1-F     | GACCTGGTCACCATCAGCAT            |
| Ifit1-R     | CAAGGCAGGTTTCTGAGGAG            |
| Ifi35-F     | GCTTGCTCCTCCTGAAGACT            |
| Ifi35-R     | ACTCTTCACTGCCAACCCCTG           |

Supplemental Table II. Ingenuity pathway analysis of 77 genes that are IRF8 direct targets identified by CHIP-seq and RNA-seq

| I<br>D | Top Diseases and Functions                                                                                   | Score | Focus<br>Molecules | Molecules in Network                                                                                                                                                                                                                                             |
|--------|--------------------------------------------------------------------------------------------------------------|-------|--------------------|------------------------------------------------------------------------------------------------------------------------------------------------------------------------------------------------------------------------------------------------------------------|
| 1      | Endocrine System Disorders,<br>Gastrointestinal Disease,<br>Immunological Disease                            | 37    | 22                 | <b>C130026121Rik, DDX58, FBN1, GBP2, GBP4, GBP6, HERC6, Ifi47, IFIH1, IFNB1, Igtf, IRF9, IRGM, LCN2, MAP3K8, mir-155, Mx1/Mx2, NMI, OAS2, PTGER4, RELA, RSAD2, RTP4, SLFN13, SRD5A1, TAPBPL, TIRAP, TMEM173, TNF, TRAFD1, TRIM21, UPP1, USP18, XAF1, ZBP1</b>    |
| 2      | Antimicrobial Response,<br>Inflammatory Response,<br>Endocrine System Disorders                              | 32    | 20                 | <b>CD274, CIITA, CISH, DDX58, GBP2, GBP6, IFI16, IFI35, IFIH1, IFIT3, IFNAR1, IFNAR2, Igp1, IL12RB1, IRF3, IRF5, IRF7, IRF9, IRGM, Irgm1, MAVS, Mx1/Mx2, OAS1, OAS2, Oasl2, PSMB8, RSAD2, SH2B3, SOCS1, STAT2, STAT3, TLR7, TYK2, USP18, WARS</b>                |
| 3      | Cellular Function and<br>Maintenance, Hematological<br>System Development and<br>Function, Tissue Morphology | 28    | 18                 | B2M, BMPR2, CCR6, CIITA, CISH, EPHA4, ERAP1, GBP2, GBP7, HLA-A, IFI30, IFNG, Igtf, IL4, IL5, <b>IL12RB1, IL15RA</b> , IRF9, JUND, KDM6B, <b>MOV10, Ms4a4b, NLRC5, PIM1, PNPLA7, POR, SBNO2, SP110, S TAT2, TAP1, TAPBP, TFEC, Tgtp1/Tgtp2, TMEM229B, TNFRSF4</b> |
| 4      | Developmental Disorder,<br>Hereditary Disorder, Cancer                                                       | 2     | 1                  | <b>ABTB2, KMT2A</b>                                                                                                                                                                                                                                              |
| 5      | Cellular Development,<br>Cellular Growth and<br>Proliferation, Hair and Skin<br>Development and Function     | 2     | 1                  | NFIB, TNS1                                                                                                                                                                                                                                                       |
| 6      | Cellular Compromise,<br>Cancer, Cell Death and<br>Survival                                                   | 2     | 1                  | <b>ARHGEF3, NFE2L2</b>                                                                                                                                                                                                                                           |

IRF8 targets are bolded.
